# Supplementary material
Source: publisher figshare collection journal article supplement (https://tandf.figshare.com/ndownloader/files/22276212)
Supplement: Supplementary file 1 [file 22276212]

## Supplementary material

### Effects of different long-term crop straw management practices on ammonia volatilization from subtropical calcareous agricultural soil

Bo-Wen Zhang<sup>a,b</sup>, Ming-Hua Zhou<sup>a</sup>, Hong-Yu Lin<sup>a,b</sup>, Tite Ntacyabukura<sup>a,b</sup>, Yan-Qiang Wang<sup>a</sup> and Bo Zhu<sup>a</sup>

<sup>a</sup>Key Laboratory of Mountain Surface Processes and Ecological Regulation, Institute of Mountain Hazards and Environment, Chinese Academy of Sciences, Chengdu 610041, China ;<sup>b</sup>University of Chinese Academy of Sciences, Beijing 100049, China

#### *A. Measurement of soil heterotrophic respiration*

In order to reflect the microbial activity, soil heterotrophic respiration ( $\text{mg C m}^{-2} \text{ h}^{-1}$ ) was also monitored between 8:00-11:00 a.m. during  $\text{NH}_3$  volatilization monitoring period by using a portable soil respiration system (LI-8100, Li-COR Inc., Lincoln, NE, USA). The soil respiration chamber was mounted on a PVC pipe (15cm in height, cross sectional area of  $81 \text{ cm}^2$ ) that was installed in each plot after fertilization at a depth of 13 cm (Liang *et al.*, 2018).

#### *B. Soil sampling and analysis*

During the  $\text{NH}_3$  monitoring period, top-soil (0-10 cm) samples were collected from each plot by using a soil corer, and the visible stone, roots and other litter were removed manually before mixed completely. The mixed samples were

extracted with 2M KCL solution (soil: solution =1:5), and then the filtered extracts were analyzed for  $\text{NH}_4^+$  and  $\text{NO}_3^-$  content by using an AA3 continuous flow analyzer (SEAL, Auto analyzer 3, Germany).

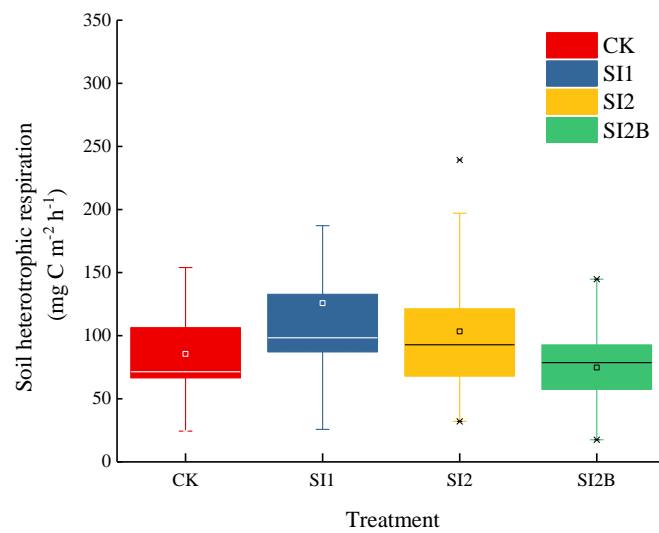

**Figure S1.** Boxplot of soil heterotrophic respiration during the  $\text{NH}_3$  volatilization monitoring period throughout the wheat–maize seasons of 2019.

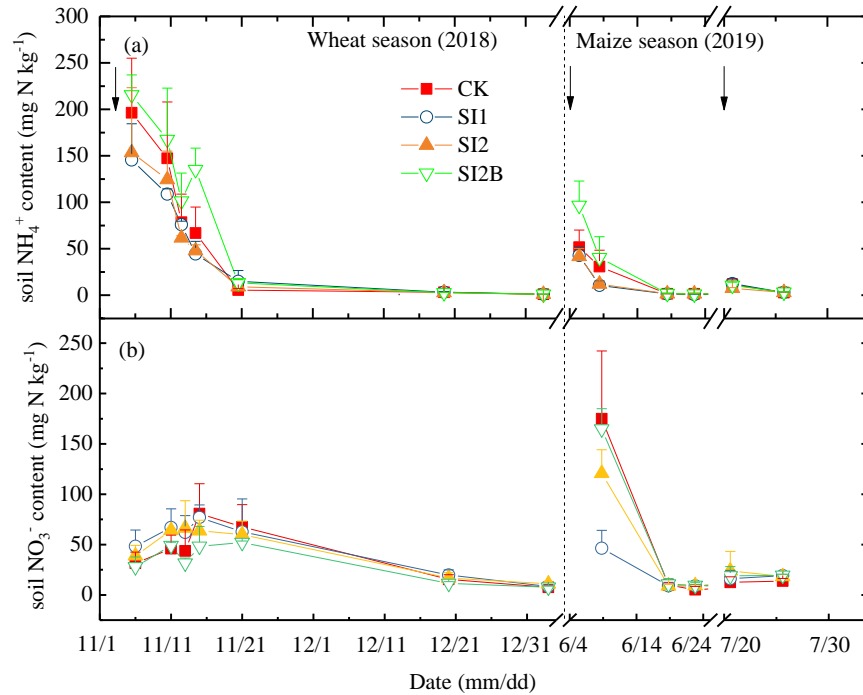

**Figure S2.** Seasonal dynamics of soil (a) ammonium ( $\text{NH}_4^+$ ) and (b) nitrate ( $\text{NO}_3^-$ ) contents during the  $\text{NH}_3$  volatilization monitoring period in the wheat–maize seasons. Vertical bars indicate standard errors of three spatial replicates. The arrows indicate the time of fertilization.

#### Reference:

Liang, G.P., Wu, H.J., Houssou, A.A., Cai, D.X., Wu, X.P., Gao, L.L., Wang, B.S., Li, S.P., 2018. Soil respiration, glomalin content, and enzymatic activity response to straw application in a wheat-maize rotation system. *Journal of Soils and Sediments* 18, 697-707.
